# Supplementary material for: Novel Virulent Bacteriophage ΦSG005, Which Infects Streptococcus gordonii, Forms a Distinct Clade among Streptococcus Viruses
Source: MDPI journal article supplement (doi:10.3390/v13101964), 2021-09-29
Supplement: s1 [file s1]

# Supplementary Materials

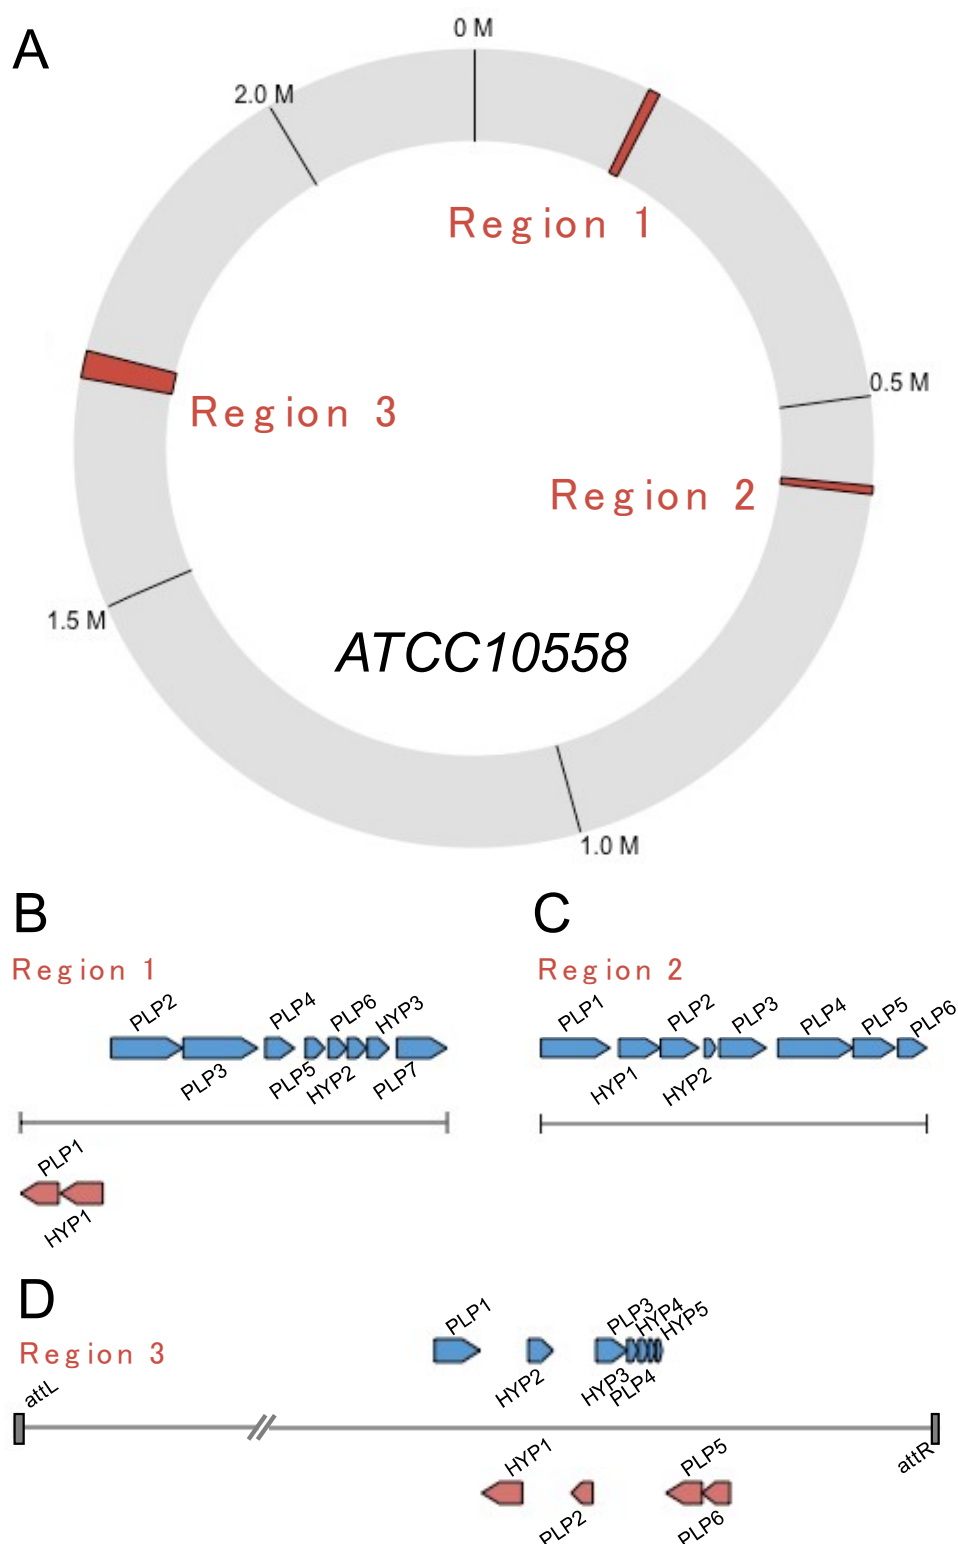

**Figure S1.** Identification of prophage-associated regions in *S. gordonii* ATCC10558.

(A) Three prophage-associated regions were detected in the chromosome of *S. gordonii* ATCC10558 by PHASTER analysis. (B-D) Genome structure of each region. Inferred CDSs are indicated as blue or red arrows (complementary).

**Table S1.** Products and predicted functions of proteins encoded by each region described in Fig. S1B-D.

| Rea-<br>gion | Completeness | Location<br>(nucleotides) | G+C<br>(%) | Gene<br>name | CDS Location<br>(nucleotides) | Str-<br>and | BLAST Hit                            |
|--------------|--------------|---------------------------|------------|--------------|-------------------------------|-------------|--------------------------------------|
| 1            | incomplete   | 157064-167169             | 43.2       | PLP1         | 157064-157966                 | -           | hypothetical protein NC_031245       |
|              |              |                           |            | PLP2         | 159207-160913                 | +           | ABC transporter NC_001884            |
|              |              |                           |            | PLP3         | 160915-162684                 | +           | ABC transporter NC_001884            |
|              |              |                           |            | PLP4         | 162863-163552                 | +           | putative amidotransferase NC_027988  |
|              |              |                           |            |              |                               |             | bifunctional NMN                     |
|              |              |                           |            | PLP5         | 163816-164265                 | +           | adenylyltransferase/nudix NC_023568  |
|              |              |                           |            |              |                               |             | hydrolase                            |
|              |              |                           |            | PLP6         | 164350-164793                 | +           | hypothetical protein NC_031017       |
|              |              |                           |            | PLP7         | 165976-167169                 | +           | hypothetical protein NC_047958       |
|              |              |                           |            | HYP1         | 157996-159012                 | -           |                                      |
| 2            | incomplete   | 579068-586553             | 41.2       | HYP2         | 164803-165261                 | +           |                                      |
|              |              |                           |            | HYP3         | 165280-165795                 | +           |                                      |
|              |              |                           |            | PLP1         | 579068-580411                 | +           | deoxynucleoside kinase NC_041884     |
|              |              |                           |            | PLP2         | 581390-582133                 | +           | ABC transporter NC_016564            |
|              |              |                           |            | PLP3         | 582527-583441                 | +           | gp344 NC_023719                      |
|              |              |                           |            | PLP4         | 583664-585124                 | +           | gp277 NC_023719                      |
|              |              |                           |            | PLP5         | 585121-585945                 | +           | gp283 NC_023719                      |
|              |              |                           |            | PLP6         | 585993-586553                 | +           | putative acetyltransferase NC_016564 |
|              |              |                           |            | HYP1         | 580581-581390                 | +           |                                      |
|              |              |                           |            | HYP2         | 582239-582463                 | +           |                                      |
| 3            | incomplete   | 1703318-1727504           | 44.7       | attL         | 1703318-1703332               | +           |                                      |
|              |              |                           |            | attR         | 1727504-1727518               | +           |                                      |
|              |              |                           |            | PLP1         | 1716456-1717460               | +           | hypothetical protein NC_042057       |
|              |              |                           |            | PLP2         | 1719466-1719939               | -           | hypothetical protein NC_047924       |
|              |              |                           |            | PLP3         | 1720012-1720707               | +           | hypothetical protein NC_042128       |
|              |              |                           |            | PLP4         | 1721164-1721325               | +           | hypothetical protein NC_048737       |
|              |              |                           |            | PLP5         | 1721550-1722350               | -           | gp245 NC_023719                      |
|              |              |                           |            | PLP6         | 1722337-1722960               | -           | ABC transporter NC_016564            |
|              |              |                           |            | HYP1         | 1717494-1718384               | -           |                                      |
|              |              |                           |            | HYP2         | 1718517-1719071               | +           |                                      |
|              |              |                           |            | HYP3         | 1720700-1720936               | +           |                                      |
|              |              |                           |            | HYP4         | 1720949-1721176               | +           |                                      |
|              |              |                           |            | HYP5         | 1721340-1721468               | +           |                                      |
